# Supplementary material
Source: HighWire-hosted journal article supplement (https://heart.bmj.com/content/108/7/550)

Supplementary Figure 1: Representative strain traces from a control, BMT and BMT+AC patient

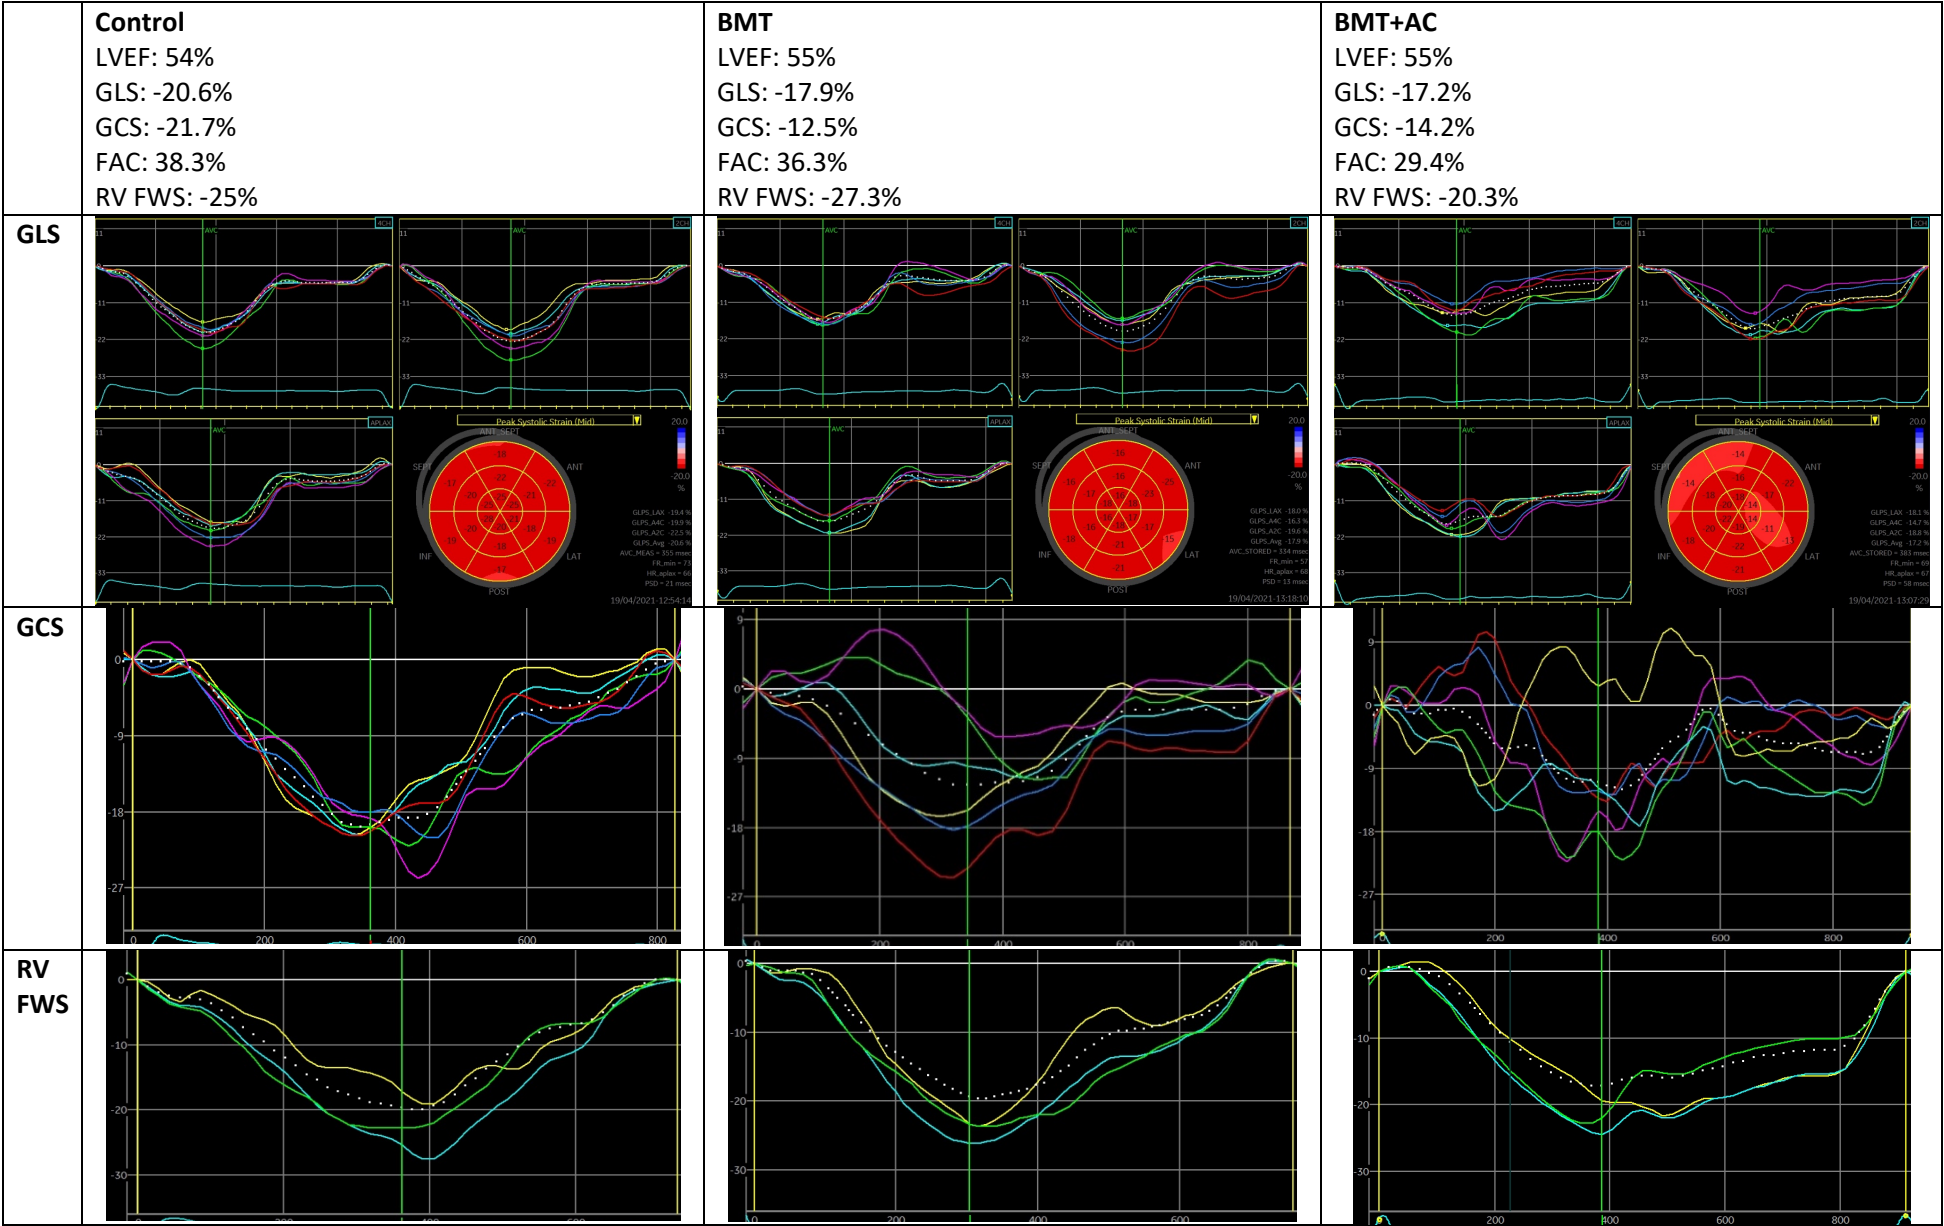

Supplement: inline-supplementary-material-2 [file inline-supplementary-material-2.pdf]
